# Supplementary material for: Two isostructural complexes of Ni(ii) and Zn(ii) with violurate and pyridine: a detailed structural, theoretical, magnetic, and NMR investigation
Source: Royal Society of Chemistry journal article supplement (doi:10.1039/d3ce00871a), 2023-01-01
Supplement: d3ce00871a1.pdf [file d3ce00871a1.pdf]

Electronic Supplementary Material (ESI) for CrystEngComm.  
This journal is © The Royal Society of Chemistry 2023

## Electronic Supporting Information

### Two isostructural complexes of Ni(II) and Zn(II) with violurate and pyridine: A detailed structural, theoretical, magnetic, and NMR investigation

Subhadip Roy,<sup>a,b</sup> Susital Mal,<sup>c</sup> Rupak Banik,<sup>b</sup> Subrata Das,<sup>\*c</sup> Ľubor Dlháň,<sup>d</sup> Ján Titiš,<sup>\*e</sup> Roman Boča,<sup>e</sup> Alexander M. Kirillov,<sup>\*f</sup> Alexander S. Novikov,<sup>g,h</sup> Paul Hazendonk,<sup>\*i</sup> Ray J. Butcher,<sup>j</sup> Antonio Bauza,<sup>k</sup> and Antonio Frontera<sup>\*k</sup>

<sup>a.</sup> Department of Chemistry, National Institute of Technology (NIT) Agartala, Pin 799046, Tripura, India

<sup>b.</sup> Department of Chemistry, The ICFAI University Tripura, Pin 799210, Tripura, India

<sup>c.</sup> Department of Chemistry, National Institute of Technology (NIT) Patna, Ashok Rajpath, Patna-800005, Bihar, India. E-mail address: subrataorgchem@gmail.com; subratad@nitp.ac.in Tel.: +91 7070093212

<sup>d.</sup> Institute of Inorganic Chemistry, FCHPT, Slovak University of Technology, 81237 Bratislava, Slovakia

<sup>e.</sup> Department of Chemistry, FPV, University of SS Cyril and Methodius, 91701 Trnava, Slovakia. E-mail address: jan.titis@ucm.sk

<sup>f.</sup> Centro de Química Estrutural, Institute of Molecular Sciences, Departamento de Engenharia Química, Instituto Superior Técnico, Universidade de Lisboa, Av. Rovisco Pais, 1049-001 Lisbon, Portugal. E-mail address: kirillov@tecnico.ulisboa.pt

<sup>g.</sup> Saint Petersburg State University, Universitetskaya Nab., 7/9, Saint Petersburg, 199034, Russian Federation

<sup>h.</sup> Peoples' Friendship University of Russia (RUDN University), Miklukho-Maklaya Street, 6, Moscow, 117198, Russian Federation

<sup>i.</sup> Department of Chemistry and Biochemistry, University of Lethbridge, 4401 University Dr, Lethbridge Alberta, Canada, T1K 3M4. E-mail address: paul.hazendonk@uleth.ca

<sup>j.</sup> Department of Chemistry, Howard University, Washington, DC 20059, USA

<sup>k.</sup> Departament de Química, Universitat de les Illes Balears, Crta. de Valldemossa km 7.5, 07122 Palma de Mallorca (Balears), Spain. E-mail address: toni.frontera@uib.es

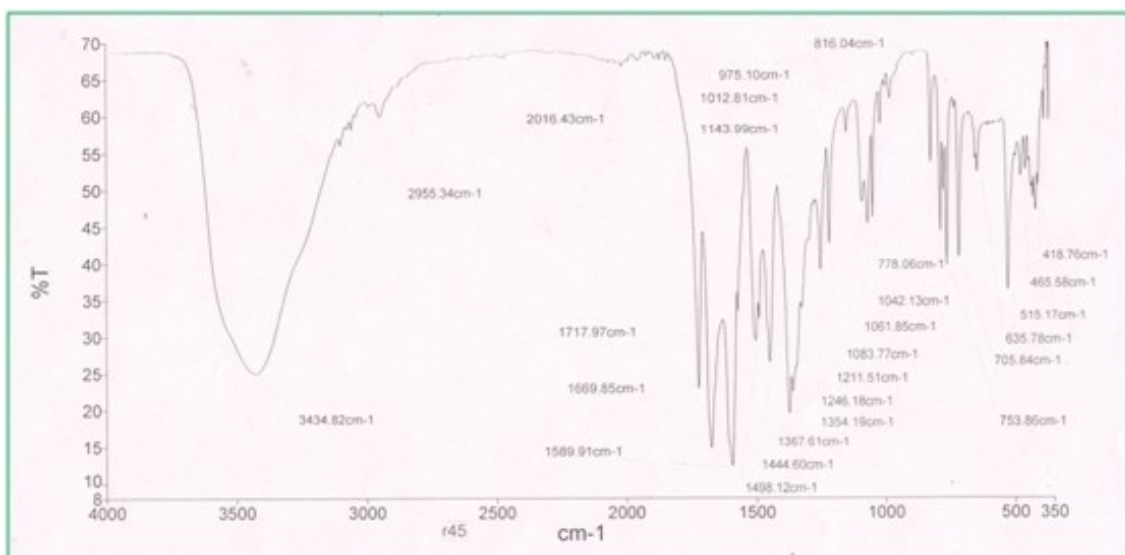

**Fig. S1** IR Spectrum of [Ni(dmv)<sub>2</sub>(py)<sub>2</sub>]<sub>2</sub>·3H<sub>2</sub>O (1)

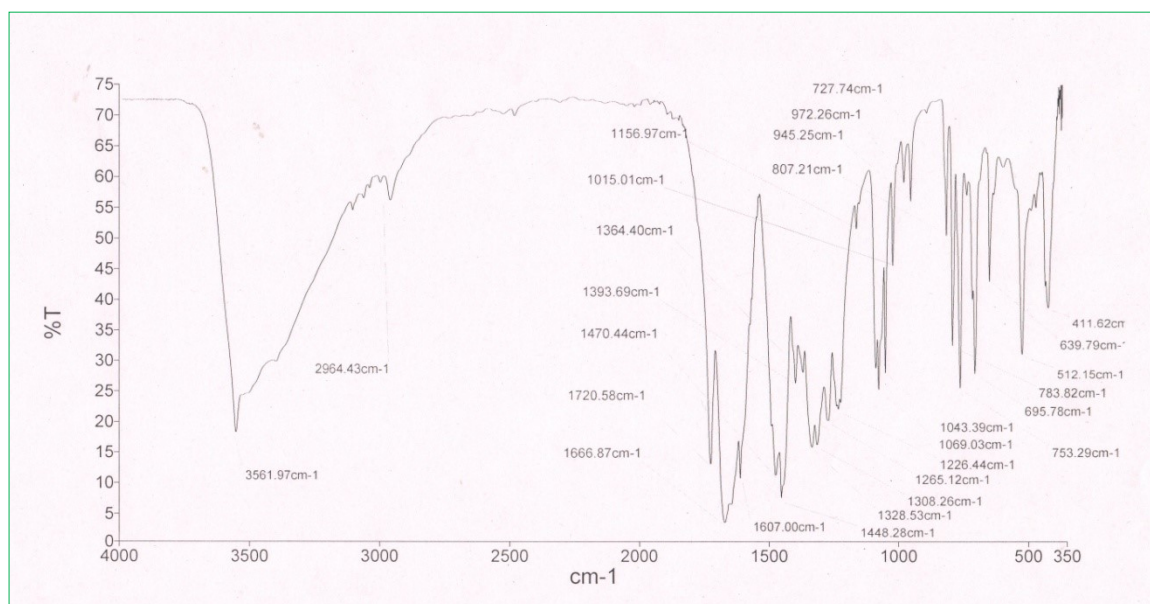

**Fig. S2** IR Spectrum of [Zn(dmv)<sub>2</sub>(py)<sub>2</sub>]<sub>2</sub>·3H<sub>2</sub>O (2)

**Table S1** Crystal data and structure refinement for the complexes

| Identification code                         | Complex 1                                                        | Complex 2                                                         |
|---------------------------------------------|------------------------------------------------------------------|-------------------------------------------------------------------|
| Empirical formula                           | C <sub>22</sub> H <sub>28</sub> N <sub>8</sub> NiO <sub>11</sub> | C <sub>22</sub> H <sub>28</sub> N <sub>8</sub> O <sub>11</sub> Zn |
| Formula weight                              | 639.23                                                           | 645.89                                                            |
| Temperature/K                               | 100(2)                                                           | 123(2)                                                            |
| Crystal system                              | triclinic                                                        | triclinic                                                         |
| Space group                                 | P-1                                                              | P-1                                                               |
| a/Å                                         | 10.9490(5)                                                       | 11.1064(9)                                                        |
| b/Å                                         | 11.9806(7)                                                       | 12.1528(11)                                                       |
| c/Å                                         | 12.0973(6)                                                       | 12.3032(12)                                                       |
| α/°                                         | 112.946(5)                                                       | 113.663(9)                                                        |
| β/°                                         | 106.988(4)                                                       | 106.663(8)                                                        |
| γ/°                                         | 99.066(4)                                                        | 98.980(7)                                                         |
| Volume/Å <sup>3</sup>                       | 1329.48(13)                                                      | 1385.8(2)                                                         |
| Z                                           | 2                                                                | 2                                                                 |
| ρ <sub>calc</sub> /g/cm <sup>3</sup>        | 1.597                                                            | 1.548                                                             |
| μ/mm <sup>-1</sup>                          | 1.728                                                            | 0.959                                                             |
| F(000)                                      | 664.0                                                            | 668.0                                                             |
| Crystal size/mm <sup>3</sup>                | 0.3 × 0.23 × 0.16                                                | 0.21 × 0.18 × 0.13                                                |
| Radiation                                   | CuKα (λ = 1.54184)                                               | MoKα (λ = 0.71073)                                                |
| 2θ range for data collection/°              | 8.878 to 145.25                                                  | 6.916 to 67.702                                                   |
| Index ranges                                | -13 ≤ h ≤ 12,<br>-14 ≤ k ≤ 14,<br>-14 ≤ l ≤ 12                   | -16 ≤ h ≤ 11,<br>-18 ≤ k ≤ 17,<br>-19 ≤ l ≤ 16                    |
| Reflections collected                       | 7951                                                             | 11499                                                             |
| Independent reflections                     | 5070 [R <sub>int</sub> = 0.0217,<br>R <sub>sigma</sub> = 0.0356] | 9459 [R <sub>int</sub> = 0.0285,<br>R <sub>sigma</sub> = 0.0822]  |
| Data/restraints/parameters                  | 5070/54/458                                                      | 9459/35/427                                                       |
| Goodness-of-fit on F <sup>2</sup>           | 1.046                                                            | 1.016                                                             |
| Final R indexes [I ≥ 2σ (I)]                | R <sub>1</sub> = 0.0326,<br>wR <sub>2</sub> = 0.0824             | R <sub>1</sub> = 0.0638,<br>wR <sub>2</sub> = 0.1304              |
| Final R indexes [all data]                  | R <sub>1</sub> = 0.0379,<br>wR <sub>2</sub> = 0.0861             | R <sub>1</sub> = 0.1111,<br>wR <sub>2</sub> = 0.1583              |
| Largest diff. peak/hole / e Å <sup>-3</sup> | 0.32/-0.35                                                       | 0.78/-0.50                                                        |

**Table S2 Bond Lengths for 1**

| Atom | Atom | Length/Å    | Atom | Atom              | Length/Å    |
|------|------|-------------|------|-------------------|-------------|
| Ni1  | O11  | 2.0551 (11) | C43  | C44               | 1.389 (3)   |
| Ni1  | N11  | 2.0769 (14) | C44  | C45               | 1.385 (2)   |
| Ni1  | N31  | 2.0707 (14) | O21  | C21               | 1.247 (2)   |
| Ni1  | N41  | 2.0809 (14) | O23  | C22               | 1.213 (2)   |
| Ni1  | O21  | 2.0709 (13) | O24  | C23               | 1.219 (2)   |
| Ni1  | N21  | 2.0832 (15) | N22  | C21               | 1.365 (2)   |
| Ni1  | O21A | 1.86 (3)    | N22  | C22               | 1.392 (2)   |
| Ni1  | O22A | 2.12 (3)    | N22  | C25               | 1.474 (2)   |
| O11  | C11  | 1.247 (2)   | N23  | C22               | 1.387 (2)   |
| O12  | N11  | 1.2601 (17) | N23  | C23               | 1.414 (2)   |
| O13  | C12  | 1.213 (2)   | N23  | C26               | 1.472 (2)   |
| O14  | C13  | 1.219 (2)   | C21  | C24               | 1.442 (2)   |
| N11  | C14  | 1.345 (2)   | C23  | C24               | 1.440 (2)   |
| N12  | C11  | 1.365 (2)   | C24  | N21               | 1.358 (2)   |
| N12  | C12  | 1.399 (2)   | O22  | N21               | 1.2478 (19) |
| N12  | C15  | 1.470 (2)   | O21A | C21A              | 1.260 (17)  |
| N13  | C12  | 1.383 (2)   | O23A | C22A              | 1.214 (17)  |
| N13  | C13  | 1.397 (2)   | O24A | C23A              | 1.221 (17)  |
| N13  | C16  | 1.472 (2)   | N22A | C21A              | 1.382 (16)  |
| N31  | C31  | 1.349 (2)   | N22A | C22A              | 1.396 (17)  |
| N31  | C35  | 1.344 (2)   | N22A | C25A              | 1.478 (18)  |
| N41  | C41  | 1.348 (2)   | N23A | C22A              | 1.391 (17)  |
| N41  | C45  | 1.342 (2)   | N23A | C23A              | 1.404 (16)  |
| C11  | C14  | 1.441 (2)   | N23A | C26A              | 1.475 (18)  |
| C13  | C14  | 1.454 (2)   | C21A | C24A              | 1.419 (17)  |
| C31  | C32  | 1.385 (2)   | C23A | C24A              | 1.431 (16)  |
| C32  | C33  | 1.383 (2)   | C24A | N21A              | 1.39 (2)    |
| C33  | C34  | 1.387 (2)   | O22A | N21A              | 1.247 (10)  |
| C34  | C35  | 1.382 (2)   | O3WA | O3WA <sup>1</sup> | 1.731 (10)  |
| C41  | C42  | 1.380 (2)   | O3WB | O3WC              | 1.37 (3)    |
| C42  | C43  | 1.382 (2)   |      |                   |             |

<sup>1</sup>2-X,-Y,1-Z

**Table S3** Bond Angles for **1**

| <b>Atom Atom Atom</b> | <b>Angle/°</b> | <b>Atom Atom Atom</b> | <b>Angle/°</b> |
|-----------------------|----------------|-----------------------|----------------|
| O11 Ni1 N11           | 79.27 (5)      | C33 C32 C31           | 119.30 (15)    |
| O11 Ni1 N31           | 93.83 (5)      | C32 C33 C34           | 118.57 (16)    |
| O11 Ni1 N41           | 89.24 (5)      | C35 C34 C33           | 119.00 (16)    |
| O11 Ni1 O21           | 170.36 (5)     | N31 C35 C34           | 122.85 (15)    |
| O11 Ni1 N21           | 100.81 (5)     | N41 C41 C42           | 122.50 (15)    |
| O11 Ni1 O22A          | 80.4 (6)       | C41 C42 C43           | 119.07 (16)    |
| N11 Ni1 N41           | 91.48 (5)      | C42 C43 C44           | 118.96 (16)    |
| N11 Ni1 N21           | 85.29 (6)      | C45 C44 C43           | 118.66 (16)    |
| N11 Ni1 O22A          | 94.4 (7)       | N41 C45 C44           | 122.62 (16)    |
| N31 Ni1 N11           | 172.64 (5)     | C21 O21 Ni1           | 110.64 (11)    |
| N31 Ni1 N41           | 90.97 (5)      | C21 N22 C22           | 123.35 (15)    |
| N31 Ni1 O21           | 95.81 (5)      | C21 N22 C25           | 119.54 (15)    |
| N31 Ni1 N21           | 93.59 (5)      | C22 N22 C25           | 117.00 (14)    |
| N31 Ni1 O22A          | 81.8 (7)       | C22 N23 C23           | 125.25 (15)    |
| N41 Ni1 N21           | 168.64 (5)     | C22 N23 C26           | 116.42 (15)    |
| N41 Ni1 O22A          | 166.9 (5)      | C23 N23 C26           | 118.32 (16)    |
| O21 Ni1 N11           | 91.10 (5)      | O21 C21 N22           | 120.19 (16)    |
| O21 Ni1 N41           | 90.70 (5)      | O21 C21 C24           | 121.72 (15)    |
| O21 Ni1 N21           | 78.50 (5)      | N22 C21 C24           | 118.06 (15)    |
| O21ANi1 O11           | 168.0 (8)      | O23 C22 N22           | 121.14 (17)    |
| O21ANi1 N11           | 94.8 (10)      | O23 C22 N23           | 121.97 (17)    |
| O21ANi1 N31           | 91.5 (11)      | N23 C22 N22           | 116.89 (15)    |
| O21ANi1 N41           | 101.4 (8)      | O24 C23 N23           | 119.78 (16)    |
| O21ANi1 O22A          | 89.8 (10)      | O24 C23 C24           | 126.00 (16)    |
| C11 O11 Ni1           | 111.93 (10)    | N23 C23 C24           | 114.20 (15)    |
| O12 N11 Ni1           | 124.91 (11)    | C23 C24 C21           | 121.36 (15)    |
| O12 N11 C14           | 121.92 (14)    | N21 C24 C21           | 112.59 (14)    |
| C14 N11 Ni1           | 113.17 (10)    | N21 C24 C23           | 125.95 (16)    |
| C11 N12 C12           | 123.56 (13)    | C24 N21 Ni1           | 111.61 (11)    |
| C11 N12 C15           | 119.01 (14)    | O22 N21 Ni1           | 125.97 (11)    |
| C12 N12 C15           | 117.33 (13)    | O22 N21 C24           | 121.75 (14)    |
| C12 N13 C13           | 125.59 (14)    | C21A O21ANi1          | 118 (2)        |
| C12 N13 C16           | 116.78 (14)    | C21A N22A C22A        | 122.9 (17)     |
| C13 N13 C16           | 117.55 (14)    | C21A N22A C25A        | 122.7 (19)     |
| C31 N31 Ni1           | 121.60 (11)    | C22A N22A C25A        | 114.3 (19)     |
| C35 N31 Ni1           | 120.46 (11)    | C22A N23A C23A        | 122.8 (18)     |
| C35 N31 C31           | 117.89 (14)    | C22A N23A C26A        | 115.4 (19)     |
| C41 N41 Ni1           | 120.46 (11)    | C23A N23A C26A        | 121.5 (19)     |
| C45 N41 Ni1           | 121.20 (11)    | O21AC21A N22A         | 114.0 (17)     |
| C45 N41 C41           | 118.17 (14)    | O21AC21A C24A         | 129 (2)        |
| O11 C11 N12           | 119.68 (14)    | N22AC21A C24A         | 115.8 (17)     |
| O11 C11 C14           | 122.57 (14)    | O23AC22A N22A         | 120 (2)        |

| Atom | Atom | Atom | Angle/°     | Atom | Atom | Atom | Angle/°    |
|------|------|------|-------------|------|------|------|------------|
| N12  | C11  | C14  | 117.74 (14) | O23A | C22A | N23A | 121 (2)    |
| O13  | C12  | N12  | 120.75 (15) | N23A | C22A | N22A | 117.7 (17) |
| O13  | C12  | N13  | 122.21 (16) | O24A | C23A | N23A | 121.2 (18) |
| N13  | C12  | N12  | 117.03 (14) | O24A | C23A | C24A | 123.4 (17) |
| O14  | C13  | N13  | 120.45 (15) | N23A | C23A | C24A | 115.0 (17) |
| O14  | C13  | C14  | 125.28 (15) | C21A | C24A | C23A | 122.9 (18) |
| N13  | C13  | C14  | 114.25 (14) | N21A | C24A | C21A | 118.9 (13) |
| N11  | C14  | C11  | 112.49 (14) | N21A | C24A | C23A | 117.7 (13) |
| N11  | C14  | C13  | 126.12 (14) | N21A | O22A | Ni1  | 118.2 (19) |
| C11  | C14  | C13  | 121.38 (14) | O22A | N21A | C24A | 129.2 (19) |
| N31  | C31  | C32  | 122.37 (16) |      |      |      |            |

**Table S4 Bond Lengths for 2**

| Atom | Atom | Length/Å    | Atom | Atom | Length/Å   |
|------|------|-------------|------|------|------------|
| Zn1  | N11  | 2.203 (3)   | N13A | C13A | 1.409 (14) |
| Zn1  | O11  | 2.155 (3)   | N13A | C16A | 1.475 (15) |
| Zn1  | O12A | 2.164 (14)  | C11A | C14A | 1.430 (15) |
| Zn1  | O11A | 1.959 (14)  | C13A | C14A | 1.425 (15) |
| Zn1  | O21  | 2.0972 (17) | O21  | C21  | 1.249 (3)  |
| Zn1  | N21  | 2.182 (2)   | O22  | N21  | 1.264 (2)  |
| Zn1  | N31  | 2.087 (2)   | O23  | C22  | 1.214 (3)  |
| Zn1  | N41  | 2.133 (2)   | O24  | C23  | 1.217 (3)  |
| O12  | N11  | 1.255 (4)   | N21  | C24  | 1.343 (3)  |
| N11  | C14  | 1.343 (4)   | N22  | C21  | 1.360 (3)  |
| O11  | C11  | 1.248 (4)   | N22  | C22  | 1.386 (4)  |
| O13  | C12  | 1.209 (4)   | N22  | C25  | 1.467 (3)  |
| O14  | C13  | 1.214 (4)   | N23  | C22  | 1.383 (4)  |
| N12  | C11  | 1.374 (4)   | N23  | C23  | 1.395 (3)  |
| N12  | C12  | 1.386 (4)   | N23  | C26  | 1.466 (4)  |
| N12  | C15  | 1.463 (5)   | C21  | C24  | 1.441 (3)  |
| N13  | C12  | 1.373 (5)   | C23  | C24  | 1.431 (4)  |
| N13  | C13  | 1.413 (4)   | N31  | C32  | 1.347 (3)  |
| N13  | C16  | 1.473 (5)   | N31  | C36  | 1.334 (4)  |
| C11  | C14  | 1.434 (5)   | C32  | C33  | 1.379 (4)  |
| C13  | C14  | 1.433 (4)   | C33  | C34  | 1.363 (5)  |
| O12A | N11A | 1.25 (2)    | C34  | C35  | 1.388 (4)  |
| N11A | C14A | 1.37 (2)    | C35  | C36  | 1.364 (4)  |
| O11A | C11A | 1.258 (14)  | N41  | C42  | 1.344 (3)  |
| O13A | C12A | 1.207 (14)  | N41  | C46  | 1.334 (3)  |
| O14A | C13A | 1.222 (15)  | C42  | C43  | 1.378 (4)  |
| N12A | C11A | 1.382 (14)  | C43  | C44  | 1.368 (4)  |

| Atom Atom | Length/Å   | Atom Atom | Length/Å  |
|-----------|------------|-----------|-----------|
| N12A C12A | 1.387 (14) | C44 C45   | 1.378 (5) |
| N12A C15A | 1.472 (15) | C45 C46   | 1.372 (4) |
| N13A C12A | 1.375 (14) |           |           |

**Table S5** Bond Angles for **2**

| Atom Atom Atom | Angle/°     | Atom Atom Atom | Angle/°     |
|----------------|-------------|----------------|-------------|
| O11 Zn1 N11    | 74.21 (10)  | C12A N13A C16A | 116.1 (16)  |
| O11 Zn1 N21    | 90.47 (11)  | C13A N13A C16A | 119.2 (16)  |
| O12A Zn1 N21   | 93.1 (4)    | O11A C11A N12A | 117.3 (14)  |
| O11A Zn1 O12A  | 84.8 (6)    | O11A C11A C14A | 125.4 (13)  |
| O11A Zn1 O21   | 165.0 (5)   | N12A C11A C14A | 116.6 (13)  |
| O11A Zn1 N21   | 92.8 (6)    | O13A C12A N12A | 121.6 (17)  |
| O11A Zn1 N31   | 96.0 (6)    | O13A C12A N13A | 119.7 (16)  |
| O11A Zn1 N41   | 98.4 (4)    | N13A C12A N12A | 118.6 (13)  |
| O21 Zn1 N11    | 103.51 (9)  | O14A C13A N13A | 119.1 (14)  |
| O21 Zn1 O11    | 166.61 (11) | O14A C13A C14A | 124.8 (15)  |
| O21 Zn1 O12A   | 85.8 (4)    | N13A C13A C14A | 115.8 (13)  |
| O21 Zn1 N21    | 76.15 (7)   | N11A C14A C11A | 124.8 (13)  |
| O21 Zn1 N41    | 92.00 (8)   | N11A C14A C13A | 113.0 (14)  |
| N21 Zn1 N11    | 83.69 (10)  | C13A C14A C11A | 122.1 (13)  |
| N31 Zn1 N11    | 94.99 (10)  | C21 O21 Zn1    | 114.08 (14) |
| N31 Zn1 O11    | 99.16 (12)  | O22 N21 Zn1    | 124.38 (18) |
| N31 Zn1 O12A   | 82.2 (4)    | O22 N21 C24    | 121.7 (2)   |
| N31 Zn1 O21    | 94.17 (8)   | C24 N21 Zn1    | 113.91 (16) |
| N31 Zn1 N21    | 169.56 (8)  | C21 N22 C22    | 124.1 (2)   |
| N31 Zn1 N41    | 92.72 (9)   | C21 N22 C25    | 118.8 (2)   |
| N41 Zn1 N11    | 162.09 (9)  | C22 N22 C25    | 117.0 (2)   |
| N41 Zn1 O11    | 88.62 (9)   | C22 N23 C23    | 124.9 (2)   |
| N41 Zn1 O12A   | 174.2 (4)   | C22 N23 C26    | 116.9 (2)   |
| N41 Zn1 N21    | 91.53 (9)   | C23 N23 C26    | 118.3 (2)   |
| O12 N11 Zn1    | 125.1 (2)   | O21 C21 N22    | 119.6 (2)   |
| O12 N11 C14    | 120.8 (3)   | O21 C21 C24    | 123.3 (2)   |
| C14 N11 Zn1    | 113.2 (2)   | N22 C21 C24    | 117.1 (2)   |
| C11 O11 Zn1    | 111.6 (2)   | O23 C22 N22    | 121.0 (3)   |
| C11 N12 C12    | 123.2 (3)   | O23 C22 N23    | 122.0 (3)   |
| C11 N12 C15    | 118.9 (3)   | N23 C22 N22    | 117.0 (2)   |
| C12 N12 C15    | 117.7 (3)   | O24 C23 N23    | 119.4 (3)   |
| C12 N13 C13    | 125.5 (3)   | O24 C23 C24    | 125.5 (3)   |
| C12 N13 C16    | 117.0 (3)   | N23 C23 C24    | 115.0 (2)   |
| C13 N13 C16    | 117.3 (3)   | N21 C24 C21    | 112.0 (2)   |
| O11 C11 N12    | 118.6 (3)   | N21 C24 C23    | 126.3 (2)   |
| O11 C11 C14    | 123.0 (3)   | C23 C24 C21    | 121.7 (2)   |

| <b>Atom</b> | <b>Atom</b> | <b>Atom</b> | <b>Angle/°</b> | <b>Atom</b> | <b>Atom</b> | <b>Atom</b> | <b>Angle/°</b> |
|-------------|-------------|-------------|----------------|-------------|-------------|-------------|----------------|
| N12         | C11         | C14         | 118.2 (3)      | C32         | N31         | Zn1         | 123.7 (2)      |
| O13         | C12         | N12         | 121.2 (4)      | C36         | N31         | Zn1         | 119.09 (18)    |
| O13         | C12         | N13         | 122.2 (4)      | C36         | N31         | C32         | 117.2 (3)      |
| N13         | C12         | N12         | 116.6 (3)      | N31         | C32         | C33         | 122.5 (3)      |
| O14         | C13         | N13         | 119.8 (3)      | C34         | C33         | C32         | 119.4 (3)      |
| O14         | C13         | C14         | 125.6 (3)      | C33         | C34         | C35         | 118.5 (3)      |
| N13         | C13         | C14         | 114.4 (3)      | C36         | C35         | C34         | 119.0 (3)      |
| N11         | C14         | C11         | 112.1 (3)      | N31         | C36         | C35         | 123.4 (3)      |
| N11         | C14         | C13         | 127.0 (3)      | C42         | N41         | Zn1         | 122.01 (18)    |
| C13         | C14         | C11         | 120.8 (3)      | C46         | N41         | Zn1         | 119.67 (19)    |
| N11A        | O12A        | Zn1         | 123.5 (12)     | C46         | N41         | C42         | 118.2 (2)      |
| O12A        | N11A        | C14A        | 123.5 (16)     | N41         | C42         | C43         | 121.9 (3)      |
| C11A        | O11A        | Zn1         | 125.0 (14)     | C44         | C43         | C42         | 119.0 (3)      |
| C11A        | N12A        | C12A        | 123.1 (13)     | C43         | C44         | C45         | 119.5 (3)      |
| C11A        | N12A        | C15A        | 121.4 (15)     | C46         | C45         | C44         | 118.3 (3)      |
| C12A        | N12A        | C15A        | 115.1 (14)     | N41         | C46         | C45         | 122.9 (3)      |
| C12A        | N13A        | C13A        | 123.2 (13)     |             |             |             |                |



**Table S6** Calculated CAS(8,5)/NEVPT2 transition energies and SOC splitting of the ground state for the complex **1**

| Root | Multiplicity | $\Delta E/\text{cm}^{-1}$ | $\Delta E^{\text{SOC}}/\text{cm}^{-1}$ |
|------|--------------|---------------------------|----------------------------------------|
| 0    | 3            | 0                         | 0, 4.6, 5.2                            |
| 1    | 3            | 11571                     |                                        |
| 2    | 3            | 11941                     |                                        |
| 3    | 3            | 14201                     |                                        |
| 0    | 1            | 15929                     |                                        |
| 1    | 1            | 16455                     |                                        |
| 4    | 3            | 19657                     |                                        |
| 5    | 3            | 21061                     |                                        |
| 6    | 3            | 21805                     |                                        |
| 2    | 1            | 27264                     |                                        |
| 3    | 1            | 27582                     |                                        |
| 4    | 1            | 29814                     |                                        |
| 5    | 1            | 30016                     |                                        |
| 7    | 3            | 30927                     |                                        |
| 8    | 3            | 32330                     |                                        |
| 9    | 3            | 32699                     |                                        |
| 6    | 1            | 34424                     |                                        |
| 7    | 1            | 36198                     |                                        |
| 8    | 1            | 36475                     |                                        |
| 9    | 1            | 44453                     |                                        |
| 10   | 1            | 44920                     |                                        |
| 11   | 1            | 45199                     |                                        |
| 12   | 1            | 45610                     |                                        |
| 13   | 1            | 45612                     |                                        |
| 14   | 1            | 69902                     |                                        |

**Table S7** Individual contributions to  $D$  and  $E$  of the excited triplet and singlet states computed at the CAS(8,5)/NEVPT2 level for the complex **1**

| Root | Multiplicity | $D/\text{cm}^{-1}$ | $E/\text{cm}^{-1}$ |
|------|--------------|--------------------|--------------------|
| 1.   | 3            | 18.23              | 18.20              |
| 2    | 3            | 15.55              | -16.91             |
| 3    | 3            | -27.20             | -0.852             |
| 4    | 3            | 0.060              | -0.044             |
| 5    | 3            | 0.023              | 0.015              |
| 6    | 3            | 0.022              | 0                  |
| 7    | 3            | 0                  | 0                  |
| 8    | 3            | 0                  | 0                  |
| 9    | 3            | 0                  | 0                  |
| 0    | 1            | 0                  | 0                  |
| 1    | 1            | 0                  | 0                  |
| 2    | 1            | -6.94              | -6.85              |
| 3    | 1            | -6.71              | 6.66               |
| 4    | 1            | 12.20              | 0                  |
| 5    | 1            | 0                  | 0                  |
| 6    | 1            | -0.030             | 0.020              |
| 7    | 1            | 0                  | 0                  |
| 8    | 1            | -0.040             | 0.012              |
| 9    | 1            | 0                  | 0                  |
| 10   | 1            | 0.028              | 0                  |
| 11   | 1            | 0.252              | 0.253              |
| 12   | 1            | -0.374             | -0.438             |
| 13   | 1            | 0.289              | 0.245              |
| 14   | 1            | 0                  | 0                  |

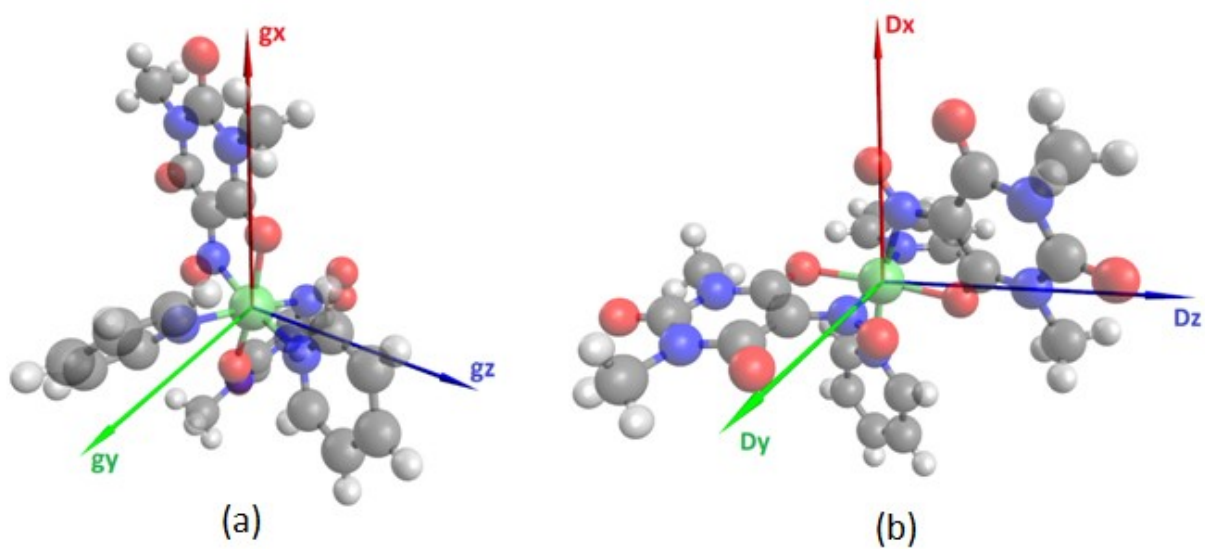

**Fig. S3** Visualization of (a) *g*- and (b) *D*-tensor orientation (magnetic axes) in molecular frame of **1**.

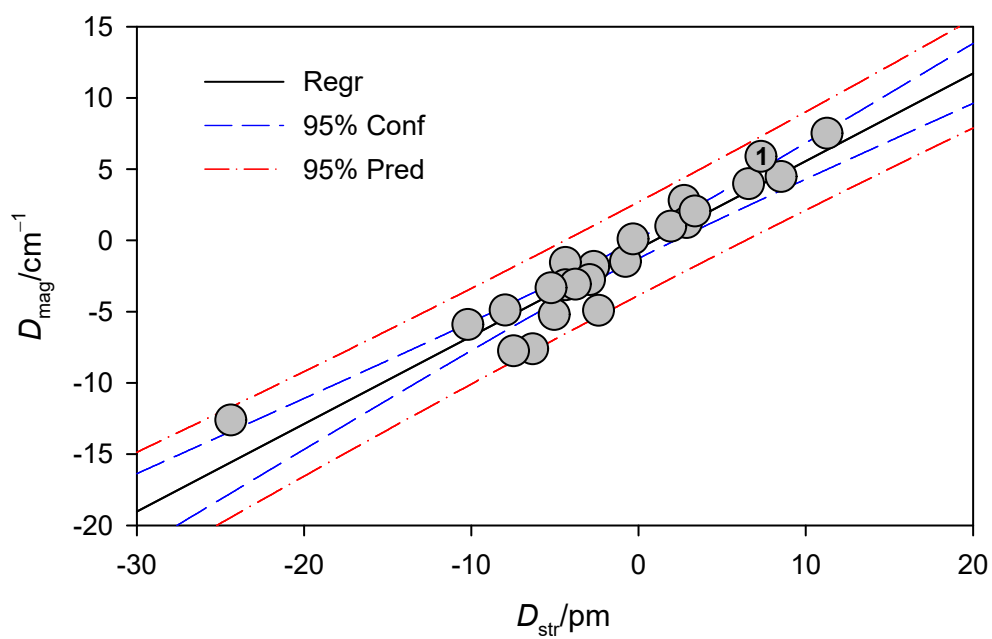

**Fig. S4** Magnetostructural  $D$ -correlation for hexacoordinate Ni(II) complexes with inclusion of the complex **1**. Correlation:  $D_{mag}[\text{cm}^{-1}] = -0.58 + 0.61D_{str}[\text{pm}]$ ,  $R^2 = 0.90$ .
